# Supplementary material for: The Effect of Smoking and Sex on the Association Between Long-term Alcohol Consumption and Metabolic Syndrome in a Middle-aged and Older Population
Source: PubMed Central journal article supplement (PMC7940979; doi:10.2188/jea.je20190328), 2021-04-05
Supplement: je-31-249-s001.pdf [file je-31-249-s001.pdf]

**eTable 1.** The Hazard ratios (HRs) and 95% confidence intervals (CIs) for risk of incident metabolic syndrome components according to alcohol consumption stratified by smoking duration in men<sup>a</sup>

|                                       |       | Alcohol consumption (g/day) |                      |                      |                 |
|---------------------------------------|-------|-----------------------------|----------------------|----------------------|-----------------|
|                                       | Never | Light<br>(0–15)             | Moderate<br>(15<–40) | Heavy<br>(>40)       | <i>P</i> –trend |
| <b>Abdominal obesity (n=3,026)</b>    |       |                             |                      |                      |                 |
| Never (n=593)                         | 1.00  | 0.65 (0.45–<br>0.94)        | 0.79 (0.49–<br>1.26) | 1.40 (0.73–<br>2.67) | 0.969           |
| <20 y (n=467)                         | 1.00  | 0.86 (0.44–<br>1.65)        | 1.01 (0.51–<br>2.01) | 0.80 (0.37–<br>1.75) | 0.914           |
| ≥20 y (n=1,966)                       | 1.00  | 0.71 (0.56–<br>0.91)        | 0.75 (0.59–<br>0.96) | 0.87 (0.66–<br>1.14) | 0.565           |
| <b>Hyperglycemia (n=2,918)</b>        |       |                             |                      |                      |                 |
| Never (n=601)                         | 1.00  | 0.64 (0.46–<br>0.87)        | 1.02 (0.70–<br>1.50) | 1.16 (0.70–<br>1.92) | 0.376           |
| <20 y (n=450)                         | 1.00  | 0.54 (0.35–<br>0.82)        | 0.62 (0.40–<br>0.98) | 1.16 (0.70–<br>1.92) | 0.092           |
| ≥20 y (n=1,867)                       | 1.00  | 0.71 (0.58–<br>0.88)        | 0.99 (0.80–<br>1.23) | 1.31 (1.04–<br>1.65) | <0.0001         |
| <b>Hypertriglyceridemia (n=2,204)</b> |       |                             |                      |                      |                 |
| Never (n=463)                         | 1.00  | 0.66 (0.45–<br>0.95)        | 0.84 (0.53–<br>1.33) | 1.45 (0.81–<br>2.61) | 0.493           |
| <20 y (n=314)                         | 1.00  | 0.91 (0.50–<br>1.65)        | 0.75 (0.40–<br>1.43) | 1.03 (0.51–<br>2.07) | 0.551           |
| ≥20 y (n=1,336)                       | 1.00  | 0.69 (0.54–<br>0.87)        | 0.98 (0.77–<br>1.26) | 0.96 (0.73–<br>1.28) | 0.166           |

Low HDL-C (*n*=2,864)

|                          |      |                      |                      |                      |         |
|--------------------------|------|----------------------|----------------------|----------------------|---------|
| Never ( <i>n</i> =580)   | 1.00 | 0.71 (0.54–<br>0.93) | 0.44 (0.30–<br>0.63) | 0.56 (0.34–<br>0.91) | <0.0001 |
| <20 y ( <i>n</i> =442)   | 1.00 | 0.52 (0.34–<br>0.82) | 0.38 (0.23–<br>0.62) | 0.33 (0.19–<br>0.59) | 0.001   |
| ≥20 y ( <i>n</i> =1,842) | 1.00 | 0.50 (0.41–<br>0.60) | 0.44 (0.36–<br>0.54) | 0.44 (0.35–<br>0.55) | <0.0001 |

Elevated blood pressure (*n*=2,017)

|                          |      |                      |                      |                      |        |
|--------------------------|------|----------------------|----------------------|----------------------|--------|
| Never ( <i>n</i> =375)   | 1.00 | 0.96 (0.67–<br>1.37) | 1.27 (0.80–<br>2.02) | 1.56 (0.79–<br>3.10) | 0.155  |
| <20 y ( <i>n</i> =317)   | 1.00 | 0.73 (0.44–<br>1.22) | 0.63 (0.36–<br>1.10) | 1.20 (0.65–<br>2.21) | 0.495  |
| ≥20 y ( <i>n</i> =1,325) | 1.00 | 0.78 (0.62–<br>0.98) | 0.88 (0.69–<br>1.13) | 1.53 (1.19–<br>1.99) | 0.0001 |

MetS (*n*=2,866)

|                          |      |                      |                      |                      |       |
|--------------------------|------|----------------------|----------------------|----------------------|-------|
| Never ( <i>n</i> =583)   | 1.00 | 0.65 (0.46–<br>0.90) | 0.77 (0.50–<br>1.19) | 0.95 (0.54–<br>1.67) | 0.486 |
| <20 y ( <i>n</i> =442)   | 1.00 | 0.64 (0.37–<br>1.11) | 0.71 (0.40–<br>1.28) | 0.71 (0.37–<br>1.37) | 0.682 |
| ≥20 y ( <i>n</i> =1,841) | 1.00 | 0.65 (0.52–<br>0.81) | 0.90 (0.72–<br>1.12) | 1.18 (0.93–<br>1.50) | 0.002 |

---

HDL-C, high density lipoprotein cholesterol; MetS, metabolic syndrome.

<sup>a</sup>HRs and 95% CIs were adjusted for age, residential location, household income, education level, physical activity, body mass index, energy intake, fruit intake, meat intake, refined grain intake, whole grain intake, and dairy intake. Subjects whose drinking period was missing were excluded from the analysis; Abdominal obesity (*n*=14), hyperglycemia (*n*=23), hypertriglyceridemia (*n*=17), low HDL-C (*n*=23), elevated blood pressure (*n*=14), metabolic syndrome (*n*=18).

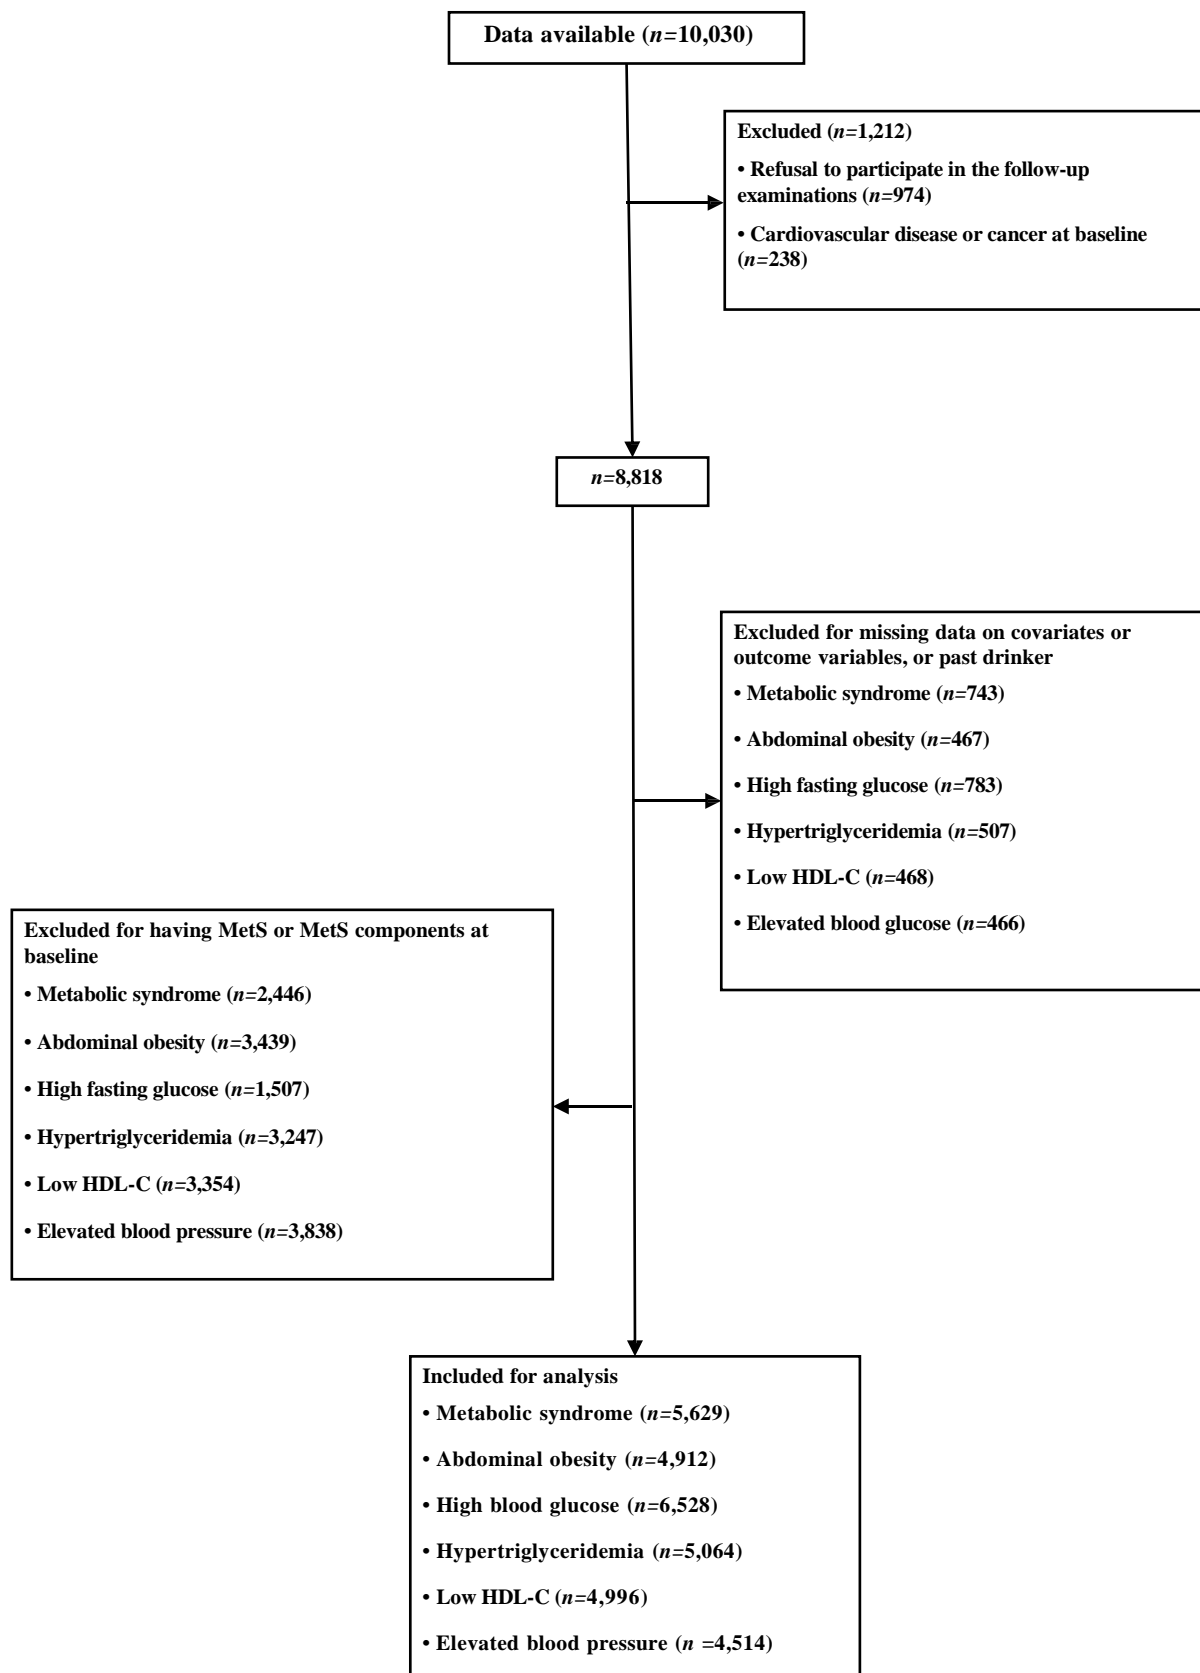

**Figure 1.** Flowchart of study population. HDL-C, high density lipoprotein cholesterol.
